# Supplementary material for: Why local and non-local terms are essential for second harmonic generation simulation?
Source: Royal Society of Chemistry journal article supplement (doi:10.1039/d1cp05437f), 2022-01-01
Supplement: d1cp05437f1.pdf [file d1cp05437f1.pdf]

## Supplementary Information of Why Local and Non-local Terms are Essential for Second Harmonic Generation Simulation?

Yann Foucaud,<sup>\*a</sup> Jean-François Dufrêche,<sup>\*a</sup> Bertrand Siboulet,<sup>a</sup> Magali Duvail,<sup>a</sup> Alban Jonchere,<sup>a</sup> Olivier Diat,<sup>a</sup> and Rodolphe Vuilleumier<sup>\*b</sup>

<sup>a</sup>ICSM, Univ Montpellier, CEA, CNRS, ENSCM, Marcoule, France

<sup>b</sup>PASTEUR, Département de chimie, Ecole normale supérieure, PSL University, Sorbonne Université, CNRS, 75005 Paris, France

**Table S1** Fresnel coefficients used in this work

| $a_1$  | $a_2$   | $a_3$  | $a_4$  | $a_5$  |
|--------|---------|--------|--------|--------|
| 0.1712 | -0.1905 | 0.0953 | 0.1613 | 0.1712 |

**Table S2** Coordinates of the ions of the water molecule in gas-phase after the geometrical optimisation for the three considered exchange-correlation functionals.

| Functional | Atom                  | $x$ (Å) | $y$ (Å) | $z$ (Å) |
|------------|-----------------------|---------|---------|---------|
| BLYP       |                       |         |         |         |
|            | <i>O</i>              | 0.0000  | 0.0000  | 0.0000  |
|            | <i>H</i> <sub>1</sub> | -0.7692 | 0.0000  | 0.5919  |
|            | <i>H</i> <sub>2</sub> | 0.7692  | 0.0000  | 0.5919  |
| PBE        |                       |         |         |         |
|            | <i>O</i>              | 0.0000  | 0.0000  | 0.0000  |
|            | <i>H</i> <sub>1</sub> | -0.7646 | 0.0000  | 0.5948  |
|            | <i>H</i> <sub>2</sub> | 0.7646  | 0.0000  | 0.5948  |
| B3LYP      |                       |         |         |         |
|            | <i>O</i>              | 0.0000  | 0.0000  | 0.0000  |
|            | <i>H</i> <sub>1</sub> | -0.7639 | 0.0000  | 0.5840  |
|            | <i>H</i> <sub>2</sub> | -0.7642 | 0.0000  | 0.5840  |

| Functional | Atom                  | $x$ (Å) | $y$ (Å) | $z$ (Å) |
|------------|-----------------------|---------|---------|---------|
| BLYP       |                       |         |         |         |
|            | <i>O</i>              | 0.0000  | 0.0000  | 0.0000  |
|            | <i>H</i> <sub>1</sub> | -0.7851 | 0.0000  | 0.5901  |
|            | <i>H</i> <sub>2</sub> | 0.7873  | 0.0000  | 0.5901  |
|            | <i>O</i>              | 2.3859  | 0.0156  | 1.5686  |
|            | <i>H</i> <sub>1</sub> | 2.9118  | 0.7856  | 1.2955  |
|            | <i>H</i> <sub>2</sub> | 2.9103  | -0.7619 | 1.3142  |
|            | <i>O</i>              | 0.3985  | 2.5461  | -1.2969 |
|            | <i>H</i> <sub>1</sub> | 0.2030  | 2.4889  | -2.2444 |
|            | <i>H</i> <sub>2</sub> | 0.1918  | 1.6556  | -0.9344 |
|            | <i>O</i>              | 0.3515  | -2.5071 | -1.3522 |
|            | <i>H</i> <sub>1</sub> | 0.1550  | -2.4140 | -2.2967 |
|            | <i>H</i> <sub>2</sub> | 0.1685  | -1.6234 | -0.9609 |
|            | <i>O</i>              | -2.3070 | 0.0109  | 1.7229  |
|            | <i>H</i> <sub>1</sub> | -2.4060 | 0.7875  | 2.2968  |
|            | <i>H</i> <sub>2</sub> | -2.4183 | -0.7609 | 2.3012  |
| PBE        |                       |         |         |         |
|            | <i>O</i>              | 0.0000  | 0.0000  | 0.0000  |
|            | <i>H</i> <sub>1</sub> | -0.7797 | 0.0000  | 0.5965  |
|            | <i>H</i> <sub>2</sub> | 0.7832  | 0.0000  | 0.5965  |
|            | <i>O</i>              | 2.3491  | 0.0072  | 1.5786  |
|            | <i>H</i> <sub>1</sub> | 2.8890  | 0.7651  | 1.3053  |
|            | <i>H</i> <sub>2</sub> | 2.8733  | -0.7727 | 1.3386  |
|            | <i>O</i>              | 0.3953  | 2.5087  | -1.3011 |
|            | <i>H</i> <sub>1</sub> | 0.1876  | 2.4308  | -2.2425 |
|            | <i>H</i> <sub>2</sub> | 0.1925  | 1.6223  | -0.9262 |
|            | <i>O</i>              | 0.3214  | -2.5171 | -1.3035 |
|            | <i>H</i> <sub>1</sub> | 0.1147  | -2.4225 | -2.2436 |
|            | <i>H</i> <sub>2</sub> | 0.1530  | -1.6271 | -0.9202 |
|            | <i>O</i>              | -2.2292 | 0.0240  | 1.7613  |
|            | <i>H</i> <sub>1</sub> | -2.3973 | 0.8066  | 2.3067  |
|            | <i>H</i> <sub>2</sub> | -2.4237 | -0.7348 | 2.3310  |

| <i>continued from previous page</i> |       |         |         |         |
|-------------------------------------|-------|---------|---------|---------|
| Functional                          | Atom  | $x$ (Å) | $y$ (Å) | $z$ (Å) |
| B3LYP                               |       |         |         |         |
|                                     | $O$   | 0.0000  | 0.0000  | 0.0000  |
|                                     | $H_1$ | -0.7764 | 0.0000  | 0.5854  |
|                                     | $H_2$ | 0.7788  | 0.0000  | 0.5854  |
|                                     | $O$   | 2.3600  | 0.0107  | 1.5636  |
|                                     | $H_1$ | 2.8913  | 0.7663  | 1.2908  |
|                                     | $H_2$ | 2.8737  | -0.7702 | 1.3317  |
|                                     | $O$   | 0.3932  | 2.4948  | -1.3277 |
|                                     | $H_1$ | 0.1847  | 2.4196  | -2.2619 |
|                                     | $H_2$ | 0.1942  | 1.6221  | -0.9444 |
|                                     | $O$   | 0.3148  | -2.5220 | -1.3036 |
|                                     | $H_1$ | 0.1070  | -2.4385 | -2.2375 |
|                                     | $H_2$ | 0.1511  | -1.6422 | -0.9203 |
|                                     | $O$   | -2.2228 | 0.0339  | 1.7700  |
|                                     | $H_1$ | -2.3923 | 0.8188  | 2.2988  |
|                                     | $H_2$ | -2.4202 | -0.7217 | 2.3312  |

**Table S3** Coordinates of the ions of the water molecule in liquid-phase after the geometrical optimisation for the three considered exchange-correlation functionals.

**Table S4** External electric fields applied on the system using the Berry phase during the wave function optimisation and the localisation of the Wannier functions. Each of the 25 below-mentioned fields corresponded to a distinct calculation and, therefore, to a distinct value of  $\mathbf{p}$ . The collinear fields are in the left part of the table while the non-collinear ones are in the right part of the table.

|    | $E_x$ (a.u.) | $E_y$ (a.u.) | $E_z$ (a.u.) |    | $E_x$ (a.u.) | $E_y$ (a.u.) | $E_z$ (a.u.) |
|----|--------------|--------------|--------------|----|--------------|--------------|--------------|
| 1  | 0.000        | 0.000        | 0.000        | 14 | 0.000        | 0.005        | 0.005        |
| 2  | 0.000        | 0.000        | 0.005        | 15 | 0.000        | -0.005       | 0.005        |
| 3  | 0.000        | 0.000        | -0.005       | 16 | 0.005        | 0.000        | 0.005        |
| 4  | 0.000        | 0.000        | 0.010        | 17 | -0.005       | 0.000        | 0.005        |
| 5  | 0.000        | 0.000        | -0.010       | 18 | 0.000        | 0.005        | 0.005        |
| 6  | 0.000        | 0.005        | 0.000        | 19 | 0.000        | -0.005       | -0.005       |
| 7  | 0.000        | -0.005       | 0.000        | 20 | 0.005        | 0.000        | -0.005       |
| 8  | 0.000        | 0.010        | 0.000        | 21 | -0.005       | 0.000        | -0.005       |
| 9  | 0.000        | -0.010       | 0.000        | 22 | 0.005        | 0.005        | 0.000        |
| 10 | 0.005        | 0.000        | 0.000        | 23 | -0.005       | 0.005        | 0.000        |
| 11 | -0.005       | 0.000        | 0.000        | 24 | -0.005       | -0.005       | 0.000        |
| 12 | 0.010        | 0.000        | 0.000        | 25 | 0.005        | -0.005       | 0.000        |
| 13 | -0.010       | 0.000        | 0.000        |    |              |              |              |

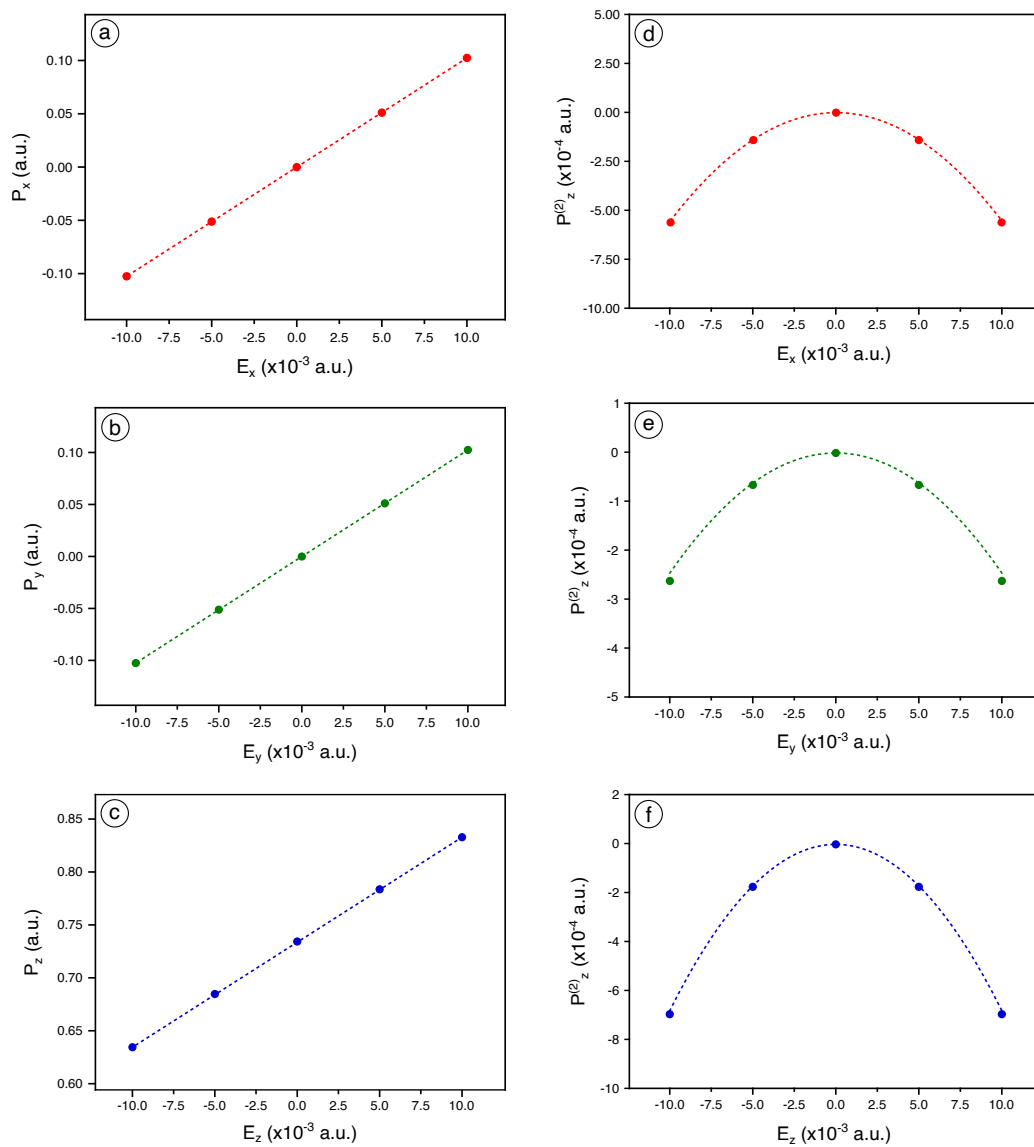

**Fig. S1** a-c. Evolution of the x (a), y (b), and z (c) components of the dipole moment of a water molecule *in vacuo* as a function of the x component (a), the y component (b), and the z component (c) of the applied external electric fields. d-f. Evolution of the quadratic term of the z-component of the dipole moment of a water molecule *in vacuo*, i.e., the dipole moment from which the permanent and linear terms have been subtracted, as a function of the x component (d), the y component (e), and the z component (f) of the applied external electric fields.

**Table S5** Values of  $\alpha_{zz}$ ,  $\beta_{zzz}$ , and  $\beta_{zxx}$  as a function of the number and intensities of external electric fields considered in the calculation.

| Electric fields ( $E_x, E_y, E_z$ ) considered in the calculation | $\alpha_{zz}$ | $\beta_{zzz}$ | $\beta_{zxx}$ |
|-------------------------------------------------------------------|---------------|---------------|---------------|
| (0,0,0), (0,0,0.005)                                              | 9.9046        | -7.2351       | -5.2715       |
| (0,0,0), (0,0,0.005), (0,0,-0.005)                                | 9.9026        | -7.0125       | -5.2666       |
| (0,0,0), (0,0,0.010), (0,0,-0.010)                                | 9.9133        | -6.9415       | -5.5758       |
| (0,0,0), (0,0,0.005), (0,0,-0.005), (0,0,0.010), (0,0,-0.010)     | 9.9107        | -6.9621       | -5.5895       |

**Table S6** Calculated quadrupole hyperpolarizability of a water molecule in a liquid-phase configuration, *i.e.*, surrounded by four water molecules. The calculations were performed using BLYP.

|                | Liquid-phase | Gas-phase |
|----------------|--------------|-----------|
| $Q_{xx}^{(0)}$ | 2.39         | 1.84      |
| $Q_{yy}^{(0)}$ | -2.57        | -1.89     |
| $Q_{zz}^{(0)}$ | 0.18         | 0.04      |
| $A_{x,zx}$     | 2.90         | 3.32      |
| $A_{x,yy}$     | -0.82        | 0.00      |
| $A_{x,zz}$     | 0.72         | 0.00      |
| $A_{y,xy}$     | -0.38        | 0.00      |
| $A_{y,yy}$     | 0.25         | 0.02      |
| $A_{y,zy}$     | -1.97        | 1.65      |
| $A_{y,zz}$     | -0.14        | -0.01     |
| $A_{z,xx}$     | 6.49         | -0.19     |
| $A_{z,xz}$     | 0.19         | -0.01     |
| $A_{z,yy}$     | -9.39        | -5.82     |
| $A_{z,zz}$     | 2.89         | 6.01      |
| $B_{xx,xx}$    | -92.99       | -71.73    |
| $B_{xz,xx}$    | -8.96        | 0.01      |
| $B_{yy,xx}$    | 154.41       | 101.17    |
| $B_{zz,xx}$    | 73.54        | 68.94     |
| $B_{xy,xy}$    | -28.00       | -34.36    |
| $B_{yz,xy}$    | -4.37        | 0.00      |
| $B_{xx,xz}$    | -2.41        | 0.49      |
| $B_{xz,xz}$    | -32.35       | -29.86    |
| $B_{yy,xz}$    | -3.08        | 0.39      |
| $B_{zz,xz}$    | -6.28        | 0.63      |
| $B_{xx,yy}$    | 63.69        | 32.23     |
| $B_{yy,yy}$    | -219.65      | -189.13   |
| $B_{zz,yy}$    | 22.70        | 49.65     |
| $B_{xy,yz}$    | -3.97        | 0.24      |
| $B_{yy,yz}$    | -3.60        | 1.36      |
| $B_{yz,yz}$    | -56.60       | -37.72    |
| $B_{xx,zz}$    | 29.29        | 39.50     |
| $B_{xz,zz}$    | -10.70       | -0.02     |
| $B_{yy,zz}$    | 65.25        | 87.96     |
| $B_{zz,zz}$    | -96.24       | -118.59   |
